# Supplementary material for: Anin vitrostudy of the cytotoxicity of TTF·TCNQ nanoparticles to mammalian cells
Source: Royal Society of Chemistry journal article supplement (doi:10.1039/d0ma00129e), 2020-01-01
Supplement: d0ma00129e1.pdf [file d0ma00129e1.pdf]

Supplementary Information file for

## In vitro study of the cytotoxicity of TTF-TCNQ nanoparticles on mammalian cells

Hongjie Chen, Géraldine Albérola, Dominique de Caro, Christophe Faulmann, Muriel Golzio, Lydie Valade\*, and Marie-Pierre Rols\*

Content:

S1. IR spectrum of TTF-TCNQ-OA

S2. Raman Spectrum of TTF-TCNQ-OA

S3. UV-vis. Spectrum of TTF-TCNQ-OA

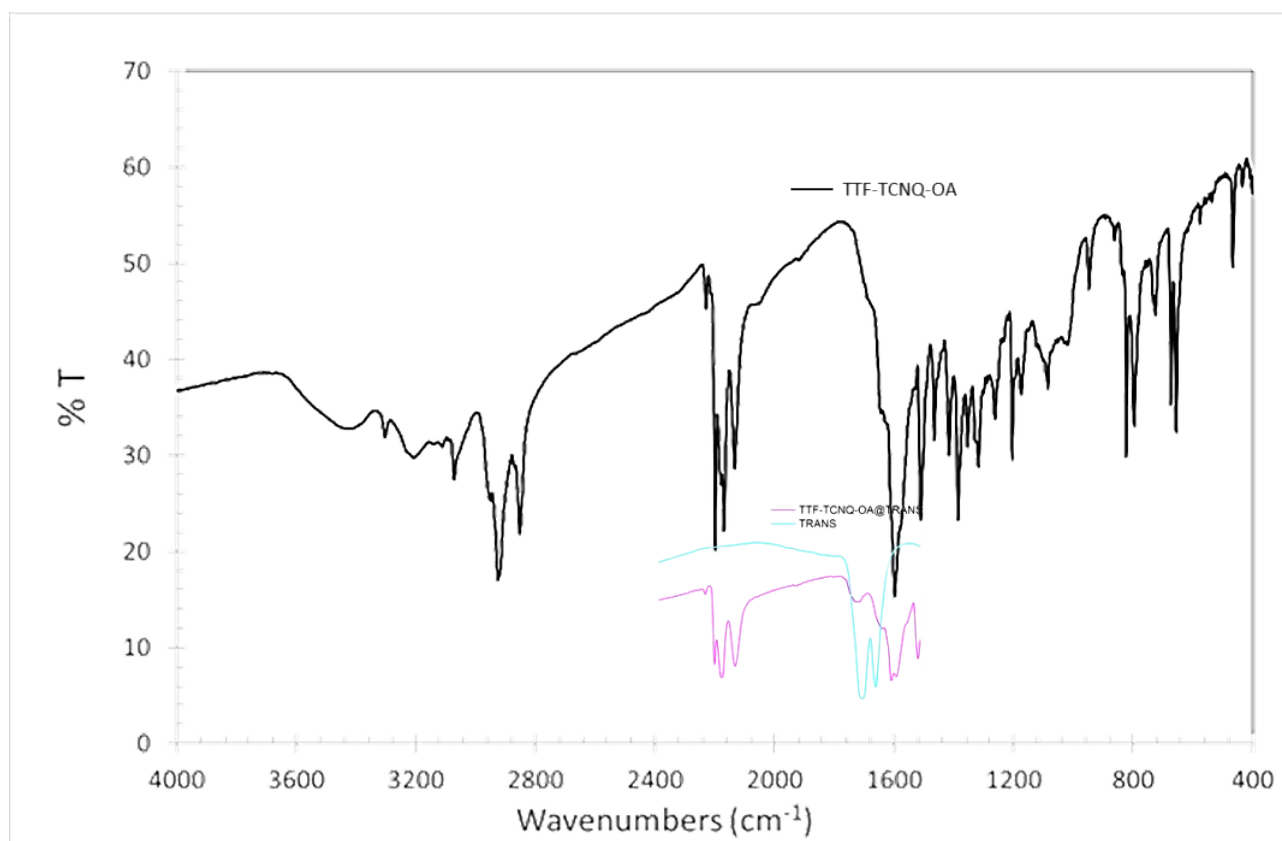

### S1. IR spectrum of TTF-TCNQ-OA (in KBr matrix)

Assignment ( $\text{cm}^{-1}$ ): 3072 (CH  $\text{sp}^2$  stretching); 2926 and 2853 (CH  $\text{sp}^3$  stretching); 2199, 2169 and 2133 (CN stretching); 1598 and 1512 (C=C stretching); 1086 (S-C-H bending); 797 (CS stretching).

Insert (in text Figure 3): CO band area of free *trans*-decenoic acid (1700) and in TTF-TCNQ-OA@TRANS (1710).

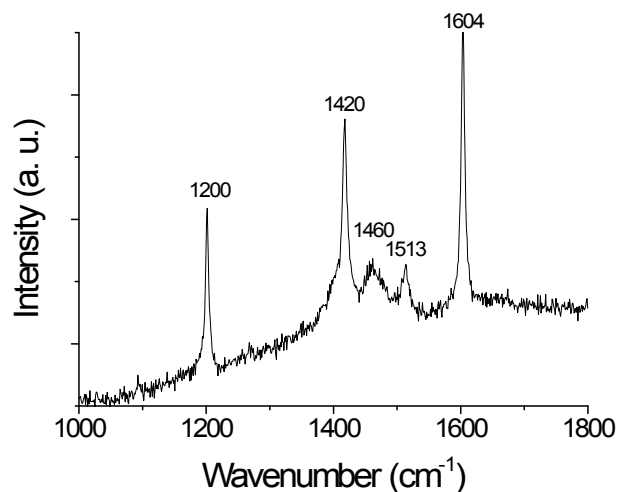

| $\nu$ (cm <sup>-1</sup> ) | Assignment                                     | Symmetry                         |
|---------------------------|------------------------------------------------|----------------------------------|
| 1200 (1202)*              | C–C–H bend and C=C ring stretch in TCNQ        | a <sub>g</sub> (ν <sub>5</sub> ) |
| 1420 (1423)               | C=C stretch in TCNQ                            | a <sub>g</sub> (ν <sub>4</sub> ) |
| 1460 (1456)               | C=C stretch center and C=C ring stretch in TTF | a <sub>g</sub> (ν <sub>3</sub> ) |
| 1513 (1520)               | C=C stretch center and C=C ring stretch in TTF | –                                |
| 1604 (1606)               | C=C ring stretch in TCNQ                       | a <sub>g</sub> (ν <sub>2</sub> ) |

## S2. Raman spectroscopy of TTF-TCNQ-OA.

Raman modes, assignments, and symmetry. \*In parentheses,  $\nu$  values for TTF-TCNQ single crystal.

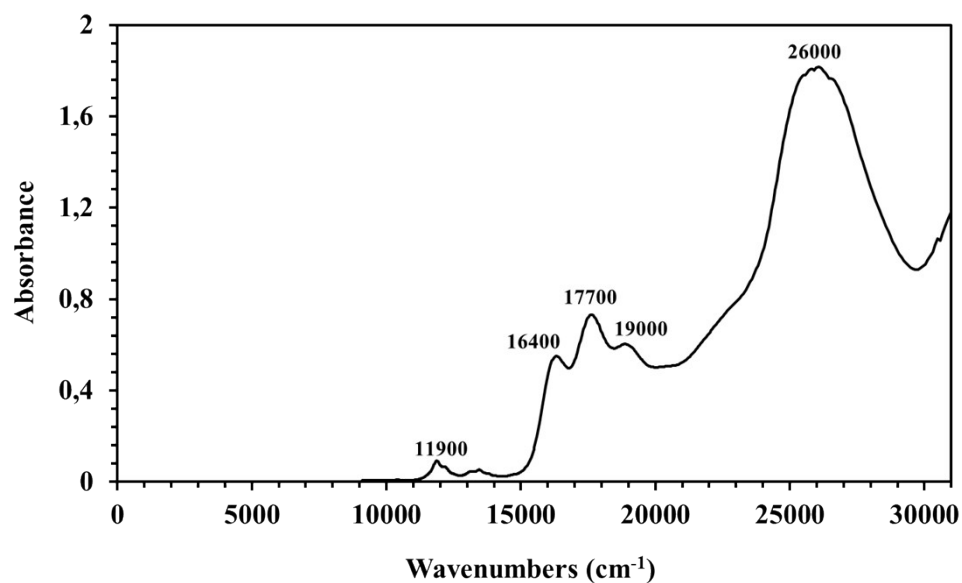

## S3. UV-vis. spectrum for TTF-TCNQ-OA in acetonitrile

Assignment ( $\text{cm}^{-1}$ ): 11900 (charge transfer band between TTF and TCNQ); 16400, 17700, 19000 and 26000 (intramolecular transitions for  $\text{TCNQ}^{\delta-}$ )
